# Supplementary material for: Comparison of Pandemic Intervention Policies in Several Building Types Using Heterogeneous Population Model
Source: bioRxiv or medRxiv preprint supplement (doi:10.1101/2021.07.15.21260564), 2021-07-19
Supplement: Supplementary file [file media-1.pdf]

# Comparison of Pandemic Intervention Policies in Several Building Types Using Heterogeneous Population Model - Supplementary Materials

Teddy Lazebnik   Ariel Alexi  
Computer Science Department, Bar Ilan University, Israel

## 1 Epidemiological (Temporal) sub-model

The epidemiological dynamics is described in Eqs. (S1-S14).

In Eq. (S1),  $\frac{dS_c(t)}{dt}$  is the dynamic amount of susceptible children over time. It is affected by the following four terms: 1) each symptomatic infected child infects susceptible children at a rate  $\beta_{cc}^s$ ; 2) each asymptomatic infected child infects susceptible children at a rate  $\beta_{cc}^a$ ; 3) each infected symptomatic adult infects the susceptible children at a rate  $\beta_{ca}^s$ ; 4) each infected asymptomatic adult infects the susceptible children at a rate  $\beta_{ca}^a$ .  $N_c$  is the size of the children population and used to take all variables as fixed proportions of the population  $N$ .

$$\frac{dS_c(t)}{dt} = -\frac{\beta_{cc}^s I_c^s(t) + \beta_{cc}^a I_c^a(t) + \beta_{ca}^s I_a^s(t) + \beta_{ca}^a I_a^a(t)}{N_c} S_c(t). \quad (\text{S1})$$

In Eq. (S2),  $\frac{dS_a(t)}{dt}$  is the dynamic amount of susceptible adult over time. It is affected by the following four terms: 1) each symptomatic infected child infects the susceptible adult at a rate  $\beta_{ac}^s$ ; 2) each asymptomatic infected child infects the susceptible adult at a rate  $\beta_{ac}^a$ ; 3) each symptomatic infected adult infects a susceptible adult at a rate  $\beta_{aa}^s$ ; 4) each asymptomatic infected adult infects a susceptible adult at a rate  $\beta_{aa}^a$ .  $N_a$  is the size of the adult population and used to take all variables as fixed proportions of the population  $N$ .

$$\frac{dS_a(t)}{dt} = -\frac{\beta_{ac}^s I_c^s(t) + \beta_{ac}^a I_c^a(t) + \beta_{aa}^s I_a^s(t) + \beta_{aa}^a I_a^a(t)}{N_a} S_a(t). \quad (\text{S2})$$

In Eq. (S3),  $\frac{dE_c^s(t)}{dt}$  is the dynamic amount of symptomatic exposed children over time. It is affected by the following five terms: 1) each symptomatic infected child infects susceptible children at a rate  $\beta_{cc}^s$ ; 2) each asymptomatic infected child infects susceptible children at a rate  $\beta_{cc}^a$ ; 3) each infected symptomatic adult infects the susceptible children at a rate  $\beta_{ca}^s$ ; 4) each infected asymptomatic adult infects the susceptible children at a rate  $\beta_{ca}^a$ ; 5) each symptomatic exposed child is transformed into an symptomatic infected child at a rate  $\xi_c^s$ . The infection terms (1-4) are multiplied by the probability a child will be symptomatic  $1 - \psi_c$ .

$$\frac{dE_c^s(t)}{dt} = (1 - \psi_c) \frac{\beta_{cc}^s I_c^s(t) + \beta_{cc}^a I_c^a(t) + \beta_{ca}^s I_a^s(t) + \beta_{ca}^a I_a^a(t)}{N_c} S_c(t) - \xi_c^s E_c^s(t). \quad (\text{S3})$$

In Eq. (S4),  $\frac{dE_c^a(t)}{dt}$  is the dynamic amount of asymptomatic exposed children over time. It is affected by the following five terms: 1) each symptomatic infected child infects susceptible children at a rate  $\beta_{cc}^s$ ; 2) each asymptomatic infected child infects susceptible children at a rate  $\beta_{cc}^a$ ; 3) each infected symptomatic adult infects the susceptible children at a rate  $\beta_{ca}^s$ ; 4) each infected asymptomatic adult infects the susceptible children at a rate  $\beta_{ca}^a$ ; 5) each asymptomatic exposed child is transformed into an symptomatic infected child at a rate  $\xi_c^a$ . The infection terms (1-4) are multiplied by the probability a child will be asymptomatic  $\psi_c$ .

$$\frac{dE_c^a(t)}{dt} = \psi_c \frac{\beta_{cc}^s I_c^s(t) + \beta_{cc}^a I_c^a(t) + \beta_{ca}^s I_a^s(t) + \beta_{ca}^a I_a^a(t)}{N_c} S_c(t) - \xi_c^a E_c^a(t). \quad (\text{S4})$$

In Eq. (S5),  $\frac{dE_a^s(t)}{dt}$  is the dynamic amount of symptomatic exposed adult over time. It is affected by the following five terms: 1) each symptomatic infected child infects the susceptible adult at a rate  $\beta_{ac}^s$ ; 2) each asymptomatic infected child infects the susceptible adult at a rate  $\beta_{ac}^a$ ; 3) each symptomatic infected adult infects a susceptible adult at a rate  $\beta_{aa}^s$ ; 4) each asymptomatic infected adult infects a susceptible adult at a

rate  $\beta_{aa}^a$ ; 5) each symptomatic exposed adult is transformed into an symptomatic infected adult at a rate  $\xi_a^s$ . The infection terms (1-4) are multiplied by the probability an adult will be symptomatic  $1 - \psi_a$ .

$$\frac{dE_a^s(t)}{dt} = (1 - \psi_a) \frac{\beta_{ac}^s I_c^s(t) + \beta_{ac}^a I_c^a(t) + \beta_{aa}^s I_a^s(t) + \beta_{aa}^a I_a^a(t)}{N_a} S_a(t) - \xi_a^s E_a^s(t). \quad (\text{S5})$$

In Eq. (S6),  $\frac{dE_a^a(t)}{dt}$  is the dynamic amount of asymptomatic exposed adult over time. It is affected by the following five terms: 1) each symptomatic infected child infects the susceptible adult at a rate  $\beta_{ac}^s$ ; 2) each asymptomatic infected child infects the susceptible adult at a rate  $\beta_{ac}^a$ ; 3) each symptomatic infected adult infects a susceptible adult at a rate  $\beta_{aa}^s$ ; 4) each asymptomatic infected adult infects a susceptible adult at a rate  $\beta_{aa}^a$ ; 5) each symptomatic exposed adult is transformed into an symptomatic infected adult at a rate  $\xi_a^a$ . The infection terms (1-4) are multiplied by the probability an adult will be asymptomatic  $\psi_a$ .

$$\frac{dE_a^a(t)}{dt} = \psi_a \frac{\beta_{ac}^s I_c^s(t) + \beta_{ac}^a I_c^a(t) + \beta_{aa}^s I_a^s(t) + \beta_{aa}^a I_a^a(t)}{N_a} S_a(t) - \xi_a^a E_a^a(t). \quad (\text{S6})$$

In Eq. (S7),  $\frac{dI_c^s(t)}{dt}$  is the dynamic amount of symptomatic infected children over time. It is affected by the following two terms: 1) individuals recover or die from the disease after period  $\gamma_c^s$ ; 2) each symptomatic exposed child is transformed into an symptomatic infected child at a rate  $\xi_c^s$ .

$$\frac{dI_c^s(t)}{dt} = \xi_c^s E_c^s(t) - \gamma_c^s I_c^s(t). \quad (\text{S7})$$

In Eq. (S8),  $\frac{dI_c^a(t)}{dt}$  is the dynamic amount of asymptomatic infected children over time. It is affected by the following two terms: 1) individuals recover from the disease after period  $\gamma_c^a$ ; 2) each asymptomatic exposed child is transformed into an asymptomatic infected child at a rate  $\xi_c^a$ .

$$\frac{dI_c^a(t)}{dt} = \xi_c^a E_c^a(t) - \gamma_c^a I_c^a(t). \quad (\text{S8})$$

In Eq. (S9),  $\frac{dI_a^s(t)}{dt}$  is the dynamic amount of symptomatic infected adult over time. It is affected by the following two terms: 1) individuals recover or die from the disease after period  $\gamma_a^s$ ; 2) each symptomatic exposed adult is transformed into an symptomatic infected adult at a rate  $\xi_a^s$ .

$$\frac{dI_a^s(t)}{dt} = \xi_a^s E_a^s(t) - \gamma_a^s I_a^s(t). \quad (\text{S9})$$

In Eq. (S10),  $\frac{dI_a^a(t)}{dt}$  is the dynamic amount of asymptomatic infected adult over time. It is affected by the following two terms: 1) individuals recover from the disease after period  $\gamma_a^a$ ; 2) each asymptomatic exposed adult is transformed into an asymptomatic infected adult at a rate  $\xi_a^a$ .

$$\frac{dI_a^a(t)}{dt} = \xi_a^a E_a^a(t) - \gamma_a^a I_a^a(t). \quad (\text{S10})$$

In Eq. (S11),  $\frac{dR_c(t)}{dt}$  is the dynamic amount of recovered children over time. It is affected by the following two terms: 1) in each point, a portion of the symptomatic infected children recover after period  $\gamma_c^s$  which is multiplied by the rate of children that do recover from the disease  $\rho_c$ ; 2) in each point, a portion of the asymptomatic infected children recover after period  $\gamma_c^a$ ;

$$\frac{dR_c(t)}{dt} = \gamma_c^s \rho_c I_c^s(t) + \gamma_c^a I_c^a(t). \quad (\text{S11})$$

In Eq. (S12),  $\frac{dR_a(t)}{dt}$  is the dynamic amount of recovered adult individuals over time. It is affected by the following two terms: 1) in each point, a portion of the symptomatic infected adults recover after period  $\gamma_a^s$  which is multiplied by the rate of adults that do recover from the disease  $\rho_a$ ; 2) in each point, a portion of the asymptomatic infected adults recover after period  $\gamma_a^a$ .

$$\frac{dR_a(t)}{dt} = \gamma_a^s \rho_a I_a^s(t) + \gamma_a^a I_a^a(t). \quad (\text{S12})$$

In Eq. (S13),  $\frac{dD_c(t)}{dt}$  is the dynamic amount of dead children over time. It is affected by the portion of the symptomatic infected children that do not recover after period  $\gamma_c^s$  which is multiplied by the rate of children that do not recover from the disease  $1 - \rho_c$ .

$$\frac{dD_c(t)}{dt} = \gamma_c^s (1 - \rho_c) I_c^s(t). \quad (\text{S13})$$

In Eq. (S14),  $\frac{dD_a(t)}{dt}$  is the dynamic amount of dead adult individuals over time. It is affected by a portion of the symptomatic infected adults that do not recover after period  $\gamma_a^s$  which is multiplied by the rate of adults that do not recover from the disease  $1 - \rho_a$ .

$$\frac{dD_a(t)}{dt} = \gamma_a^s(1 - \rho_a)I_a^s(t). \quad (\text{S14})$$
